# Supplementary material for: Standardized protocols and procedures can precisely and accurately quantify non-structural carbohydrates
Source: PubMed Central journal article supplement — Tree Physiol. 2018 Oct 30;38(12):1764–78. doi: 10.1093/treephys/tpy118 (PMC6301340; doi:10.1093/treephys/tpy118), 2018-10-30
Supplement: tpy118_nsc_supplementary_statistical_data_for_tree_phys.pdf [file tpy118_nsc_supplementary_statistical_data_for_tree_phys.pdf]

## **Supplementary Statistical Data**

Standardized protocols and procedures can precisely and accurately quantify non-structural carbohydrates

Simon M. Landhäusser<sup>1\*</sup>; Pak S. Chow<sup>1</sup>; L. Turin Dickman<sup>2</sup>, Morgan E. Furze<sup>3</sup>, Iris Kuhlman<sup>4</sup>, Sandra Schmid<sup>5</sup>, Julia Wiesenbauer<sup>6</sup>; Birgit Wild<sup>7,8</sup>; Gerd Gleixner<sup>4</sup>; Henrik Hartmann<sup>4</sup>; Günter Hoch<sup>5</sup>, Nate G. McDowell<sup>9</sup>; Andrew D. Richardson<sup>3,10</sup>; Andreas Richter<sup>6</sup>; Henry D. Adams<sup>11</sup>

<sup>1</sup> Department of Renewable Resources, University of Alberta, Edmonton, Alberta, Canada

<sup>2</sup> Los Alamos National Laboratory, Earth and Environmental Sciences, Los Alamos, NM, USA

<sup>3</sup> Harvard University, Department of Organismic and Evolutionary Biology, Cambridge MA, USA

<sup>4</sup> Max Planck Institute for Biogeochemistry, Jena, Germany

<sup>5</sup> Department of Environmental Sciences - Botany, University of Basel, Basel, Switzerland

<sup>6</sup> University of Vienna, Department of Microbiology and Ecosystem Science, Vienna, Austria

<sup>7</sup> Stockholm University, Department of Environmental Science and Analytical Chemistry, Stockholm, Sweden

<sup>8</sup> University of Gothenburg, Department of Earth Sciences, Gothenburg, Sweden

<sup>9</sup> Pacific Northwest National Lab, Richland WA, USA.

<sup>10</sup> Northern Arizona University, Center for Ecosystem Science and Society and School of Informatics, Computing and Cyber Systems, Flagstaff AZ, USA.

<sup>11</sup> Oklahoma State University, Department of Plant Biology, Ecology, and Evolution, Stillwater, OK, USA

**Table S6.** A summary of Levene’s test for unequal variance results for all statistical tests in the study where either ANOVA or the Kruskal-Wallis test was used in data analysis. “Experiment” refers to the corresponding experiment as described in Materials and Methods. “Analysis” refers to the specific analysis within that experiment. “Figure” refers to the figure which shows the data and results of this analysis. “Sample” is the specific tissue analyzed. “Quantification method” refers to either the ion chromatography (IC), enzyme, or phenol-sulfuric acid method used in sugar quantification. Quantification method is not noted where it was included as a main factor in the analysis (all analyses for experiments 1 and 2). The Levene’s test result was either significant (\*,  $p < 0.05$ ) or not significant (ns,  $p > 0.05$ ).

| Experiment    | Analysis                   | Figure | Sample        | Quantification Method            | NSC component             | Levene's test result |            |  |           |    |
|---------------|----------------------------|--------|---------------|----------------------------------|---------------------------|----------------------|------------|--|-----------|----|
| 1             | Sample handling            | 1      | Aspen leaf    |                                  | Sugar                     | *                    |            |  |           |    |
|               |                            |        |               |                                  | Starch                    | ns                   |            |  |           |    |
|               |                            |        |               |                                  | Total NSC                 | *                    |            |  |           |    |
|               |                            |        | Aspen stem    |                                  | Sugar                     | ns                   |            |  |           |    |
|               |                            |        |               |                                  | Starch                    | ns                   |            |  |           |    |
|               |                            |        |               |                                  | Total NSC                 | ns                   |            |  |           |    |
|               |                            |        | Spruce needle |                                  | Sugar                     | *                    |            |  |           |    |
|               |                            |        |               |                                  | Starch                    | ns                   |            |  |           |    |
|               |                            |        |               |                                  | Total NSC                 | ns                   |            |  |           |    |
|               |                            |        | 1             |                                  | Storage x microwave at 8h | 1                    | Aspen leaf |  | Sugar     | ns |
|               |                            |        |               |                                  |                           |                      |            |  | Starch    | ns |
|               |                            |        |               |                                  |                           |                      |            |  | Total NSC | ns |
| Aspen stem    | Sugar                      | ns     |               |                                  |                           |                      |            |  |           |    |
|               | Starch                     | ns     |               |                                  |                           |                      |            |  |           |    |
|               | Total NSC                  | ns     |               |                                  |                           |                      |            |  |           |    |
| Spruce needle | Sugar                      | ns     |               |                                  |                           |                      |            |  |           |    |
|               | Starch                     | ns     |               |                                  |                           |                      |            |  |           |    |
|               | Total NSC                  | ns     |               |                                  |                           |                      |            |  |           |    |
| 1             | Storage x microwave x time | S1     |               | Aspen leaf                       |                           |                      |            |  | Sugar     | ns |
|               |                            |        |               |                                  |                           |                      |            |  | Starch    | ns |
|               |                            |        |               |                                  |                           |                      |            |  | Total NSC | ns |
|               |                            |        | Aspen stem    | Sugar                            | ns                        |                      |            |  |           |    |
|               |                            |        |               | Starch                           | ns                        |                      |            |  |           |    |
|               |                            |        |               | Total NSC                        | ns                        |                      |            |  |           |    |
|               |                            |        | Spruce needle | Sugar                            | ns                        |                      |            |  |           |    |
|               |                            |        |               | Starch                           | ns                        |                      |            |  |           |    |
|               |                            |        |               | Total NSC                        | ns                        |                      |            |  |           |    |
|               |                            |        | 2             | Plant materials x quantification | 4                         | Aspen Fine Root      |            |  | Sugar     | ns |
|               |                            |        |               |                                  |                           |                      |            |  | Starch    | ns |

|   |                                    |                |                 |           |           |    |
|---|------------------------------------|----------------|-----------------|-----------|-----------|----|
|   |                                    |                |                 | Total NSC | ns        |    |
|   |                                    | Aspen leaf     |                 | Sugar     | *         |    |
|   |                                    |                |                 | Starch    | ns        |    |
|   |                                    | Aspen phloem   |                 | Total NSC | *         |    |
|   |                                    |                |                 | Sugar     | *         |    |
|   |                                    |                |                 | Starch    | *         |    |
|   |                                    | Aspen xylem    |                 | Total NSC | *         |    |
|   |                                    |                |                 | Sugar     | *         |    |
|   |                                    |                |                 | Starch    | ns        |    |
|   |                                    | Pine fine root |                 | Total NSC | *         |    |
|   |                                    |                |                 | Sugar     | ns        |    |
|   |                                    |                |                 | Starch    | *         |    |
|   |                                    | Pine needle    |                 | Total NSC | *         |    |
|   |                                    |                |                 | Sugar     | ns        |    |
|   |                                    |                |                 | Starch    | *         |    |
|   |                                    | Pine phloem    |                 | Total NSC | ns        |    |
|   |                                    |                |                 | Sugar     | *         |    |
|   |                                    |                |                 | Starch    | ns        |    |
|   |                                    | Pine xylem     |                 | Total NSC | *         |    |
|   |                                    |                |                 | Sugar     | *         |    |
|   |                                    |                |                 | Starch    | *         |    |
|   |                                    | Plum leaf      |                 | Total NSC | *         |    |
|   |                                    |                |                 | Sugar     | *         |    |
|   |                                    |                |                 | Starch    | ns        |    |
|   |                                    |                |                 | Total NSC | *         |    |
| 3 | Independent vs. central extraction | 5              | Aspen fine root | IC        | Sugar     | *  |
|   |                                    |                |                 |           | Starch    | ns |
|   |                                    |                |                 |           | Total NSC | ns |
|   |                                    |                |                 | Enzyme    | Sugar     | *  |
|   |                                    |                |                 |           | Starch    | ns |
|   |                                    |                |                 |           | Total NSC | *  |
|   |                                    |                |                 | Acid      | Sugar     | ns |
|   |                                    |                |                 |           | Starch    | *  |
|   |                                    |                |                 |           | Total NSC | ns |
|   |                                    |                | Pine fine root  | IC        | Sugar     | ns |
|   |                                    |                |                 |           | Starch    | *  |
|   |                                    |                |                 |           | Total NSC | *  |
|   |                                    |                |                 | Enzyme    | Sugar     | *  |
|   |                                    |                |                 |           | Starch    | ns |
|   |                                    |                |                 |           | Total NSC | *  |
|   |                                    |                |                 | Acid      | Sugar     | ns |
|   |                                    |                |                 |           | Starch    | ns |
|   |                                    |                |                 |           | Total NSC | ns |
| 3 | Centralized quantification         | 6              | Aspen fine root | Acid      | Sugar     | ns |
|   |                                    |                |                 |           | Starch    | ns |
|   |                                    |                |                 |           | Total NSC | *  |
|   |                                    |                | Pine fine root  | Acid      | Sugar     | *  |
|   |                                    |                |                 |           | Starch    | ns |
|   |                                    |                |                 |           | Total NSC | ns |

**Table S7.** Kruskal-Wallis summary table for analysis of aspen leaf sugar, Fig 1, left panel

| <b>N</b> | <b>Test statistic</b> | <b>df</b> | <b>p</b> |
|----------|-----------------------|-----------|----------|
| 9        | 7.2                   | 2         | 0.027    |

**Table S8.** ANOVA summary table for analysis of aspen leaf starch, Fig. 1, left panel. Sum of squares is type III.

| <b>Source</b>   | <b>Sum of Squares</b> | <b>df</b> | <b>Mean square</b> | <b>F</b> | <b>p</b> |
|-----------------|-----------------------|-----------|--------------------|----------|----------|
| Corrected Model | .007                  | 2         | .004               | 4.431    | .066     |
| Intercept       | .156                  | 1         | .156               | 184.651  | <.001    |
| Treatment       | .007                  | 2         | .004               | 4.431    | .066     |
| Error           | .005                  | 6         | .001               |          |          |
| Total           | .168                  | 9         |                    |          |          |

**Table S9.** Kruskal-Wallis summary table for analysis of aspen leaf NSC, Fig 1, left panel

| <b>N</b> | <b>Test statistic</b> | <b>df</b> | <b>p</b> |
|----------|-----------------------|-----------|----------|
| 9        | 7.2                   | 2         | 0.027    |

**Table S10.** ANOVA summary table for analysis of aspen stem sugar, Fig. 1, left panel.

| <b>Source</b>   | <b>Sum of Squares</b> | <b>df</b> | <b>Mean square</b> | <b>F</b>   | <b>p</b> |
|-----------------|-----------------------|-----------|--------------------|------------|----------|
| Corrected Model | .137                  | 2         | .068               | 5.500      | .044     |
| Intercept       | 1259.384              | 1         | 1259.384           | 101453.431 | <.001    |
| Treatment       | .137                  | 2         | .068               | 5.500      | .044     |
| Error           | .074                  | 6         | .012               |            |          |
| Total           | 1259.595              | 9         |                    |            |          |

**Table S11.** ANOVA summary table for analysis of aspen stem starch, Fig. 1, left panel.

| <b>Source</b>   | <b>Sum of Squares</b> | <b>df</b> | <b>Mean square</b> | <b>F</b> | <b>p</b> |
|-----------------|-----------------------|-----------|--------------------|----------|----------|
| Corrected Model | 1.025                 | 2         | .513               | 9.602    | .013     |
| Intercept       | 77.481                | 1         | 77.481             | 1451.031 | <.001    |
| Treatment       | 1.025                 | 2         | .513               | 9.602    | .013     |
| Error           | .320                  | 6         | .053               |          |          |
| Total           | 78.826                | 9         |                    |          |          |

**Table S12.** ANOVA summary table for analysis of aspen stem NSC, Fig. 1, left panel.

| <b>Source</b>   | <b>Sum of Squares</b> | <b>df</b> | <b>Mean square</b> | <b>F</b>  | <b>p</b> |
|-----------------|-----------------------|-----------|--------------------|-----------|----------|
| Corrected Model | 1.906                 | 2         | .953               | 24.188    | .001     |
| Intercept       | 1961.899              | 1         | 1961.899           | 49794.400 | <.001    |
| Treatment       | 1.906                 | 2         | .953               | 24.188    | .001     |
| Error           | .236                  | 6         | .039               |           |          |
| Total           | 1964.042              | 9         |                    |           |          |

**Table S13.** Kruskal-Wallis summary table for analysis of spruce needle sugar, Fig 1, left panel

| <b>N</b> | <b>Test statistic</b> | <b>df</b> | <b>p</b> |
|----------|-----------------------|-----------|----------|
| 9        | 5.6                   | 2         | 0.061    |

**Table S14.** ANOVA summary table for analysis of spruce needle starch, Fig. 1, left panel.

| <b>Source</b>   | <b>Sum of Squares</b> | <b>df</b> | <b>Mean square</b> | <b>F</b> | <b>p</b> |
|-----------------|-----------------------|-----------|--------------------|----------|----------|
| Corrected Model | .022                  | 2         | .011               | 10.307   | .011     |
| Intercept       | 3.080                 | 1         | 3.080              | 2900.301 | <.001    |
| Treatment       | .022                  | 2         | .011               | 10.307   | .011     |
| Error           | .006                  | 6         | .001               |          |          |
| Total           | 3.108                 | 9         |                    |          |          |

**Table S15.** ANOVA summary table for analysis of spruce needle NSC, Fig. 1, left panel.

| <b>Source</b>   | <b>Sum of Squares</b> | <b>df</b> | <b>Mean square</b> | <b>F</b>  | <b>p</b> |
|-----------------|-----------------------|-----------|--------------------|-----------|----------|
| Corrected Model | .356                  | 2         | .178               | 5.630     | .042     |
| Intercept       | 2657.059              | 1         | 2657.059           | 83936.573 | <.001    |
| Treatment       | .356                  | 2         | .178               | 5.630     | .042     |
| Error           | .190                  | 6         | .032               |           |          |
| Total           | 2657.605              | 9         |                    |           |          |

**Table S16.** ANOVA summary table for analysis of aspen leaf sugar, Fig. 1, right panel.

| <b>Source</b>       | <b>Sum of Squares</b> | <b>df</b> | <b>Mean square</b> | <b>F</b>   | <b>p</b> |
|---------------------|-----------------------|-----------|--------------------|------------|----------|
| Corrected Model     | 3.527                 | 3         | 1.176              | 37.175     | 0        |
| Intercept           | 3741.672              | 1         | 3741.672           | 118326.978 | 0        |
| Treatment           | 3.298                 | 1         | 3.298              | 104.31     | 0        |
| Storage             | 0.224                 | 1         | 0.224              | 7.078      | 0.029    |
| Storage x Treatment | 0.004                 | 1         | 0.004              | 0.138      | 0.72     |
| Error               | 0.253                 | 8         | 0.032              |            |          |
| Total               | 3745.452              | 12        |                    |            |          |

**Table S17.** ANOVA summary table for analysis of aspen leaf starch, Fig. 1, right panel.

| <b>Source</b>       | <b>Sum of Squares</b> | <b>df</b> | <b>Mean square</b> | <b>F</b> | <b>p</b> |
|---------------------|-----------------------|-----------|--------------------|----------|----------|
| Corrected Model     | .012                  | 3         | .004               | 1.941    | .202     |
| Intercept           | .238                  | 1         | .238               | 117.654  | <.001    |
| Treatment           | .012                  | 1         | .012               | 5.726    | .044     |
| Storage             | 3.180E-05             | 1         | 3.180E-05          | .016     | .903     |
| Storage x Treatment | .000                  | 1         | .000               | .080     | .784     |
| Error               | .016                  | 8         | .002               |          |          |
| Total               | .266                  | 12        |                    |          |          |

**Table S18.** ANOVA summary table for analysis of aspen leaf NSC, Fig. 1, right panel.

| <b>Source</b>       | <b>Sum of Squares</b> | <b>df</b> | <b>Mean square</b> | <b>F</b>   | <b>p</b> |
|---------------------|-----------------------|-----------|--------------------|------------|----------|
| Corrected Model     | 3.918                 | 3         | 1.306              | 38.746     | <.001    |
| Intercept           | 3801.012              | 1         | 3801.012           | 112761.792 | <.001    |
| Treatment           | 3.685                 | 1         | 3.685              | 109.326    | <.001    |
| Storage             | .227                  | 1         | .227               | 6.731      | .032     |
| Storage x Treatment | .006                  | 1         | .006               | .180       | .682     |
| Error               | .270                  | 8         | .034               |            |          |
| Total               | 3805.200              | 12        |                    |            |          |

**Table S19.** ANOVA summary table for analysis of aspen stem sugar, Fig. 1, right panel.

| <b>Source</b>       | <b>Sum of Squares</b> | <b>df</b> | <b>Mean square</b> | <b>F</b>  | <b>p</b> |
|---------------------|-----------------------|-----------|--------------------|-----------|----------|
| Corrected Model     | 2.240                 | 3         | .747               | 16.481    | .001     |
| Intercept           | 1821.378              | 1         | 1821.378           | 40195.274 | <.001    |
| Treatment           | .085                  | 1         | .085               | 1.879     | .208     |
| Storage             | 1.435                 | 1         | 1.435              | 31.663    | <.001    |
| Storage x Treatment | .721                  | 1         | .721               | 15.901    | .004     |
| Error               | .363                  | 8         | .045               |           |          |
| Total               | 1823.981              | 12        |                    |           |          |

**Table S20.** ANOVA summary table for analysis of aspen stem starch, Fig. 1, right panel.

| <b>Source</b>       | <b>Sum of Squares</b> | <b>df</b> | <b>Mean square</b> | <b>F</b> | <b>p</b> |
|---------------------|-----------------------|-----------|--------------------|----------|----------|
| Corrected Model     | .196                  | 3         | .065               | 1.135    | .392     |
| Intercept           | 100.270               | 1         | 100.270            | 1740.320 | <.001    |
| Treatment           | .064                  | 1         | .064               | 1.106    | .324     |
| Storage             | .013                  | 1         | .013               | .228     | .646     |
| Storage x Treatment | .119                  | 1         | .119               | 2.071    | .188     |
| Error               | .461                  | 8         | .058               |          |          |
| Total               | 100.927               | 12        |                    |          |          |

**Table S21.** ANOVA summary table for analysis of aspen stem NSC, Fig. 1, right panel.

| <b>Source</b>       | <b>Sum of Squares</b> | <b>df</b> | <b>Mean square</b> | <b>F</b>  | <b>p</b> |
|---------------------|-----------------------|-----------|--------------------|-----------|----------|
| Corrected Model     | 1.432                 | 3         | .477               | 5.198     | .028     |
| Intercept           | 2776.129              | 1         | 2776.129           | 30227.339 | <.001    |
| Treatment           | .002                  | 1         | .002               | .018      | .897     |
| Storage             | 1.178                 | 1         | 1.178              | 12.828    | .007     |
| Storage x Treatment | .252                  | 1         | .252               | 2.747     | .136     |
| Error               | .735                  | 8         | .092               |           |          |
| Total               | 2778.296              | 12        |                    |           |          |

**Table S22.** ANOVA summary table for analysis of spruce needle sugar, Fig. 1, right panel.

| <b>Source</b>       | <b>Sum of Squares</b> | <b>df</b> | <b>Mean square</b> | <b>F</b>  | <b>p</b> |
|---------------------|-----------------------|-----------|--------------------|-----------|----------|
| Corrected Model     | .385                  | 3         | .128               | 2.196     | .166     |
| Intercept           | 3223.859              | 1         | 3223.859           | 55103.333 | <.001    |
| Treatment           | .236                  | 1         | .236               | 4.027     | .080     |
| Storage             | .007                  | 1         | .007               | .123      | .735     |
| Storage x Treatment | .143                  | 1         | .143               | 2.437     | .157     |
| Error               | .468                  | 8         | .059               |           |          |
| Total               | 3224.712              | 12        |                    |           |          |

**Table S23.** ANOVA summary table for analysis of spruce needle starch, Fig. 1, right panel.

| <b>Source</b>       | <b>Sum of Squares</b> | <b>df</b> | <b>Mean square</b> | <b>F</b> | <b>p</b> |
|---------------------|-----------------------|-----------|--------------------|----------|----------|
| Corrected Model     | .164                  | 3         | .055               | 33.233   | <.001    |
| Intercept           | 3.527                 | 1         | 3.527              | 2143.007 | <.001    |
| Treatment           | .142                  | 1         | .142               | 86.169   | <.001    |
| Storage             | .000                  | 1         | .000               | .065     | .806     |
| Storage x Treatment | .022                  | 1         | .022               | 13.465   | .006     |
| Error               | .013                  | 8         | .002               |          |          |
| Total               | 3.704                 | 12        |                    |          |          |

**Table S24.** ANOVA summary table for analysis of spruce needle NSC, Fig. 1, right panel.

| <b>Source</b>       | <b>Sum of Squares</b> | <b>df</b> | <b>Mean square</b> | <b>F</b>  | <b>p</b> |
|---------------------|-----------------------|-----------|--------------------|-----------|----------|
| Corrected Model     | 1.036                 | 3         | .345               | 5.295     | .026     |
| Intercept           | 3440.853              | 1         | 3440.853           | 52773.824 | <.001    |
| Treatment           | .750                  | 1         | .750               | 11.503    | .009     |
| Storage             | .010                  | 1         | .010               | .148      | .711     |
| Storage x Treatment | .276                  | 1         | .276               | 4.234     | .074     |
| Error               | .522                  | 8         | .065               |           |          |
| Total               | 3442.411              | 12        |                    |           |          |



**Table S25.** One-sample t-test summary table for analysis of s1, IC method, Fig 2.

| <b>Component</b> | <b>t</b> | <b>df</b> | <b>p</b> | <b>Mean Difference</b> |
|------------------|----------|-----------|----------|------------------------|
| Sugar            | 1.190    | 5         | .288     | .77667                 |
| Starch           | 1.590    | 5         | .173     | .47215                 |
| Total NSC        | 2.541    | 5         | .052     | 1.24983                |

**Table S26.** One-sample t-test summary table for analysis of s1, enzyme method, Fig 2.

| <b>Component</b> | <b>t</b> | <b>df</b> | <b>p</b> | <b>Mean Difference</b> |
|------------------|----------|-----------|----------|------------------------|
| Sugar            | -1.457   | 5         | .205     | -.58333                |
| Starch           | 1.453    | 5         | .206     | .09795                 |
| Total NSC        | -1.286   | 5         | .255     | -.48612                |

**Table S27.** One-sample t-test summary table for analysis of s1, acid method, Fig 2.

| <b>Component</b> | <b>t</b> | <b>df</b> | <b>p</b> | <b>Mean Difference</b> |
|------------------|----------|-----------|----------|------------------------|
| Sugar            | -.741    | 5         | .492     | -.33500                |
| Starch           | -.195    | 5         | .853     | -.09158                |
| Total NSC        | -.616    | 5         | .565     | -.42622                |

**Table S28.** One-sample t-test summary table for analysis of s2, IC method, Fig 2.

| <b>Component</b> | <b>t</b> | <b>df</b> | <b>p</b> | <b>Mean Difference</b> |
|------------------|----------|-----------|----------|------------------------|
| Sugar            | .918     | 5         | .401     | .63167                 |
| Starch           | -.173    | 5         | .869     | -.04765                |
| Total NSC        | 1.211    | 5         | .280     | .61545                 |

**Table S29.** One-sample t-test summary table for analysis of s2, enzyme method, Fig 2.

| <b>Component</b> | <b>t</b> | <b>df</b> | <b>p</b> | <b>Mean Difference</b> |
|------------------|----------|-----------|----------|------------------------|
| Sugar            | -1.618   | 4         | .181     | -1.09000               |
| Starch           | -1.153   | 4         | .313     | -.52840                |
| Total NSC        | -4.015   | 4         | .016     | -1.61484               |

**Table S30.** One-sample t-test summary table for analysis of s2, acid method, Fig 2.

| <b>Component</b> | <b>t</b> | <b>df</b> | <b>p</b> | <b>Mean Difference</b> |
|------------------|----------|-----------|----------|------------------------|
| Sugar            | 5.475    | 5         | .003     | .85000                 |
| Starch           | -1.403   | 5         | .219     | -.60262                |
| Total NSC        | .622     | 5         | .561     | .25110                 |

**Table S31.** ANOVA summary table for analysis of aspen fine root sugar, Fig. 4.

| <b>Source</b>           | <b>Sum of Squares</b> | <b>df</b> | <b>Mean square</b> | <b>F</b> | <b>p</b> |
|-------------------------|-----------------------|-----------|--------------------|----------|----------|
| Intercept, hypothesis   | 3791.463              | 1         | 3791.463           | 553.402  | <.001    |
| Intercept, error        | 20.554                | 3         | 6.851              |          |          |
| Method, hypothesis      | 480.226               | 2         | 240.113            | 35.047   | .008     |
| Method, error           | 20.554                | 3         | 6.851              |          |          |
| Lab(method), hypothesis | 20.554                | 3         | 6.851              | 34.559   | <.001    |
| Lab(method), error      | 2.379                 | 12        | .198               |          |          |

**Table S32.** ANOVA summary table for analysis of aspen fine root starch, Fig. 4.

| <b>Source</b>           | <b>Sum of Squares</b> | <b>df</b> | <b>Mean square</b> | <b>F</b> | <b>p</b> |
|-------------------------|-----------------------|-----------|--------------------|----------|----------|
| Intercept, hypothesis   | 3945.840              | 1         | 3945.840           | 850.656  | <.001    |
| Intercept, error        | 13.916                | 3         | 4.639              |          |          |
| Method, hypothesis      | .422                  | 2         | .211               | .045     | .956     |
| Method, error           | 13.916                | 3         | 4.639              |          |          |
| Lab(method), hypothesis | 13.916                | 3         | 4.639              | 16.035   | <.001    |
| Lab(method), error      | 3.471                 | 12        | .289               |          |          |

**Table S33.** ANOVA summary table for analysis of aspen fine root NSC, Fig. 4.

| <b>Source</b>           | <b>Sum of Squares</b> | <b>df</b> | <b>Mean square</b> | <b>F</b>  | <b>p</b> |
|-------------------------|-----------------------|-----------|--------------------|-----------|----------|
| Intercept, hypothesis   | 15472.164             | 1         | 15472.164          | 29246.411 | <.001    |
| Intercept, error        | 1.587                 | 3         | .529               |           |          |
| Method, hypothesis      | 452.151               | 2         | 226.075            | 427.341   | <.001    |
| Method, error           | 1.587                 | 3         | .529               |           |          |
| Lab(method), hypothesis | 1.587                 | 3         | .529               | 1.276     | .327     |
| Lab(method), error      | 4.975                 | 12        | .415               |           |          |

**Table S34.** Kruskal-Wallis summary table for analysis of aspen leaf sugar, Fig. 4.

| <b>N</b> | <b>Test statistic</b> | <b>df</b> | <b>p</b> |
|----------|-----------------------|-----------|----------|
| 18       | 13.053                | 2         | 0.001    |

**Table S35.** ANOVA summary table for analysis of aspen leaf starch, Fig. 4.

| <b>Source</b>           | <b>Sum of Squares</b> | <b>df</b> | <b>Mean square</b> | <b>F</b> | <b>p</b> |
|-------------------------|-----------------------|-----------|--------------------|----------|----------|
| Intercept, hypothesis   | .240                  | 1         | .240               | 6.118    | .090     |
| Intercept, error        | .118                  | 3         | .039               |          |          |
| Method, hypothesis      | .003                  | 2         | .002               | .039     | .962     |
| Method, error           | .118                  | 3         | .039               |          |          |
| Lab(method), hypothesis | .118                  | 3         | .039               | 26.465   | <.001    |
| Lab(method), error      | .018                  | 12        | .001               |          |          |

**Table S36.** Kruskal-Wallis summary table for analysis of aspen leaf NSC, Fig 4.

| <b>N</b> | <b>Test statistic</b> | <b>df</b> | <b>p</b> |
|----------|-----------------------|-----------|----------|
| 18       | 12.551                | 2         | 0.002    |

**Table S37.** Kruskal-Wallis summary table for analysis of aspen phloem sugar, Fig 4.

| <b>N</b> | <b>Test statistic</b> | <b>df</b> | <b>P</b> |
|----------|-----------------------|-----------|----------|
| 18       | 12.316                | 2         | 0.002    |

**Table S38.** Kruskal-Wallis summary table for analysis of aspen phloem starch, Fig 4.

| <b>N</b> | <b>Test statistic</b> | <b>df</b> | <b>p</b> |
|----------|-----------------------|-----------|----------|
| 18       | 7.906                 | 2         | 0.019    |

**Table S39.** Kruskal-Wallis summary table for analysis of aspen phloem NSC, Fig 4.

| <b>N</b> | <b>Test statistic</b> | <b>df</b> | <b>p</b> |
|----------|-----------------------|-----------|----------|
| 18       | 12.129                | 2         | 0.002    |

**Table S40.** Kruskal-Wallis summary table for analysis of aspen xylem sugar, Fig 4.

| <b>N</b> | <b>Test statistic</b> | <b>df</b> | <b>P</b> |
|----------|-----------------------|-----------|----------|
| 17       | 12.933                | 2         | 0.002    |

**Table S41.** ANOVA summary table for analysis of aspen xylem starch, Fig. 4.

| <b>Source</b>           | <b>Sum of Squares</b> | <b>df</b> | <b>Mean square</b> | <b>F</b> | <b>p</b> |
|-------------------------|-----------------------|-----------|--------------------|----------|----------|
| Intercept, hypothesis   | 1.592                 | 1         | 1.592              | 1025.612 | <.001    |
| Intercept, error        | .005                  | 3.031     | .002               |          |          |
| Method, hypothesis      | .097                  | 2         | .049               | 31.264   | .010     |
| Method, error           | .005                  | 3.014     | .002               |          |          |
| Lab(method), hypothesis | .005                  | 3         | .002               | 2.176    | .149     |
| Lab(method), error      | .008                  | 11        | .001               |          |          |

**Table S42.** Kruskal-Wallis summary table for analysis of aspen xylem NSC, Fig 4.

| <b>N</b> | <b>Test statistic</b> | <b>df</b> | <b>p</b> |
|----------|-----------------------|-----------|----------|
| 18       | 13.8345               | 2         | 0.001    |

**Table S43.** ANOVA summary table for analysis of pine fine root sugar, Fig. 4.

| <b>Source</b>           | <b>Sum of Squares</b> | <b>df</b> | <b>Mean square</b> | <b>F</b> | <b>p</b> |
|-------------------------|-----------------------|-----------|--------------------|----------|----------|
| Intercept, hypothesis   | 139.556               | 1         | 139.556            | 150.990  | .001     |
| Intercept, error        | 2.773                 | 3         | .924               |          |          |
| Method, hypothesis      | 47.677                | 2         | 23.839             | 25.792   | .013     |
| Method, error           | 2.773                 | 3         | .924               |          |          |
| Lab(method), hypothesis | 2.773                 | 3         | .924               | 23.370   | <.001    |
| Lab(method), error      | .475                  | 12        | .040               |          |          |

**Table S44.** Kruskal-Wallis summary table for analysis of pine fine root starch, Fig 4.

| <b>N</b> | <b>Test statistic</b> | <b>df</b> | <b>p</b> |
|----------|-----------------------|-----------|----------|
| 18       | 12.616                | 2         | 0.002    |

**Table S45.** Kruskal-Wallis summary table for analysis of pine fine root NSC, Fig 4.

| <b>N</b> | <b>Test statistic</b> | <b>df</b> | <b>p</b> |
|----------|-----------------------|-----------|----------|
| 18       | 8.225                 | 2         | 0.016    |

**Table S46.** ANOVA summary table for analysis of pine needle sugar, Fig. 4.

| <b>Source</b>           | <b>Sum of Squares</b> | <b>df</b> | <b>Mean square</b> | <b>F</b> | <b>p</b> |
|-------------------------|-----------------------|-----------|--------------------|----------|----------|
| Intercept, hypothesis   | 538.576               | 1         | 538.576            | 440.313  | <.001    |
| Intercept, error        | 3.670                 | 3         | 1.223              |          |          |
| Method, hypothesis      | 104.550               | 2         | 52.275             | 42.737   | .006     |
| Method, error           | 3.670                 | 3         | 1.223              |          |          |
| Lab(method), hypothesis | 3.670                 | 3         | 1.223              | 29.553   | <.001    |
| Lab(method), error      | .497                  | 12        | .041               |          |          |

**Table S47.** Kruskal-Wallis summary table for analysis of pine needle starch, Fig 4.

| <b>N</b> | <b>Test statistic</b> | <b>df</b> | <b>p</b> |
|----------|-----------------------|-----------|----------|
| 18       | 11.368                | 2         | 0.003    |

**Table S48.** ANOVA summary table for analysis of pine needle NSC, Fig. 4.

| <b>Source</b>           | <b>Sum of Squares</b> | <b>df</b> | <b>Mean square</b> | <b>F</b> | <b>p</b> |
|-------------------------|-----------------------|-----------|--------------------|----------|----------|
| Intercept, hypothesis   | 1277.483              | 1         | 1277.483           | 237.023  | .001     |
| Intercept, error        | 16.169                | 3         | 5.390              |          |          |
| Method, hypothesis      | 46.830                | 2         | 23.415             | 4.344    | .130     |
| Method, error           | 16.169                | 3         | 5.390              |          |          |
| Lab(method), hypothesis | 16.169                | 3         | 5.390              | 56.296   | <.001    |
| Lab(method), error      | 1.149                 | 12        | .096               |          |          |

**Table S49.** Kruskal-Wallis summary table for analysis of pine phloem sugar, Fig 4.

| <b>N</b> | <b>Test statistic</b> | <b>df</b> | <b>p</b> |
|----------|-----------------------|-----------|----------|
| 18       | 11.453                | 2         | 0.003    |

**Table S50.** ANOVA summary table for analysis of pine phloem starch, Fig. 4.

| <b>Source</b>           | <b>Sum of Squares</b> | <b>df</b> | <b>Mean square</b> | <b>F</b> | <b>p</b> |
|-------------------------|-----------------------|-----------|--------------------|----------|----------|
| Intercept, hypothesis   | 14.136                | 1         | 14.136             | 47.095   | .006     |
| Intercept, error        | .900                  | 3         | .300               |          |          |
| Method, hypothesis      | 2.118                 | 2         | 1.059              | 3.528    | .163     |
| Method, error           | .900                  | 3         | .300               |          |          |
| Lab(method), hypothesis | .900                  | 3         | .300               | 111.532  | <.001    |
| Lab(method), error      | .032                  | 12        | .003               |          |          |

**Table S51.** Kruskal-Wallis summary table for analysis of pine phloem NSC, Fig 4.

| <b>N</b> | <b>Test statistic</b> | <b>df</b> | <b>p</b> |
|----------|-----------------------|-----------|----------|
| 18       | 11.392                | 2         | 0.003    |

**Table S52.** Kruskal-Wallis summary table for analysis of pine xylem sugar, Fig 4.

| <b>N</b> | <b>Test statistic</b> | <b>df</b> | <b>p</b> |
|----------|-----------------------|-----------|----------|
| 18       | 11.509                | 2         | 0.003    |

**Table S53.** Kruskal-Wallis summary table for analysis of pine xylem starch, Fig 4.

| <b>N</b> | <b>Test statistic</b> | <b>df</b> | <b>p</b> |
|----------|-----------------------|-----------|----------|
| 18       | 12.367                | 2         | 0.002    |

**Table S54.** Kruskal-Wallis summary table for analysis of pine xylem NSC, Fig 4.

| <b>N</b> | <b>Test statistic</b> | <b>df</b> | <b>p</b> |
|----------|-----------------------|-----------|----------|
| 18       | 12.684                | 2         | 0.002    |

**Table S55.** Kruskal-Wallis summary table for analysis of plum leaf sugar, Fig 4.

| <b>N</b> | <b>Test statistic</b> | <b>df</b> | <b>p</b> |
|----------|-----------------------|-----------|----------|
| 18       | 14.014                | 2         | 0.001    |

**Table S56.** ANOVA summary table for analysis of plum leaf starch, Fig. 4.

| <b>Source</b>           | <b>Sum of Squares</b> | <b>df</b> | <b>Mean square</b> | <b>F</b> | <b>p</b> |
|-------------------------|-----------------------|-----------|--------------------|----------|----------|
| Intercept, hypothesis   | 23.049                | 1         | 23.049             | 307.389  | <.001    |
| Intercept, error        | .225                  | 3         | .075               |          |          |
| Method, hypothesis      | 2.948                 | 2         | 1.474              | 19.661   | .019     |
| Method, error           | .225                  | 3         | .075               |          |          |
| Lab(method), hypothesis | .225                  | 3         | .075               | 8.507    | .003     |
| Lab(method), error      | .106                  | 12        | .009               |          |          |

**Table S57.** Kruskal-Wallis summary table for analysis of plum leaf NSC, Fig 4.

| <b>N</b> | <b>Test statistic</b> | <b>df</b> | <b>p</b> |
|----------|-----------------------|-----------|----------|
| 18       | 14.764                | 2         | 0.001    |

**Table S58.** Mann-Whitney test summary table for analysis of aspen fine root sugar, IC method, Fig. 5.

| <b>N</b> | <b>Test statistic</b> | <b>p</b> |
|----------|-----------------------|----------|
| 12       | 12                    | 0.394    |

**Table S59.** ANOVA summary table for aspen fine root starch, IC method, Fig. 5.

| <b>Source</b>                     | <b>Sum of Squares</b> | <b>df</b> | <b>Mean square</b> | <b>F</b> | <b>p</b> |
|-----------------------------------|-----------------------|-----------|--------------------|----------|----------|
| Intercept, hypothesis             | 2580.612              | 1         | 2580.612           | 1809.697 | .015     |
| Intercept, error                  | 1.426                 | 1         | 1.426              |          |          |
| Lab, hypothesis                   | 1.426                 | 1         | 1.426              | .215     | .724     |
| Lab, error                        | 6.640                 | 1         | 6.640              |          |          |
| Extraction type, hypothesis       | .785                  | 1         | .785               | .118     | .789     |
| Extraction type, error            | 6.640                 | 1         | 6.640              |          |          |
| Extraction type * Lab, hypothesis | 6.640                 | 1         | 6.640              | 10.023   | .013     |
| Extraction type * Lab, error      | 5.300                 | 8         | .662               |          |          |

**Table S60.** ANOVA summary table for aspen fine root NSC, IC method, Fig. 5.

| <b>Source</b>                     | <b>Sum of Squares</b> | <b>df</b> | <b>Mean square</b> | <b>F</b> | <b>p</b> |
|-----------------------------------|-----------------------|-----------|--------------------|----------|----------|
| Intercept, hypothesis             | 7378.496              | 1         | 7378.496           | 1608.205 | .016     |
| Intercept, error                  | 4.588                 | 1         | 4.588              |          |          |
| Lab, hypothesis                   | 4.588                 | 1         | 4.588              | 4.296    | .286     |
| Lab, error                        | 1.068                 | 1         | 1.068              |          |          |
| Extraction type, hypothesis       | 4.514                 | 1         | 4.514              | 4.227    | .288     |
| Extraction type, error            | 1.068                 | 1         | 1.068              |          |          |
| Extraction type * Lab, hypothesis | 1.068                 | 1         | 1.068              | 1.308    | .286     |
| Extraction type * Lab, error      | 6.534                 | 8         | .817               |          |          |

**Table S61.** Mann-Whitney test summary table for analysis of aspen fine root sugar, enzyme method, Fig 5.

| <b>N</b> | <b>Test statistic</b> | <b>p</b> |
|----------|-----------------------|----------|
| 12       | 2                     | 0.009    |

**Table S62.** ANOVA summary table for aspen fine root starch, enzyme method, Fig. 5.

| <b>Source</b>                     | <b>Sum of Squares</b> | <b>df</b> | <b>Mean square</b> | <b>F</b> | <b>p</b> |
|-----------------------------------|-----------------------|-----------|--------------------|----------|----------|
| Intercept, hypothesis             | 2317.869              | 1         | 2317.869           | 277.681  | .038     |
| Intercept, error                  | 8.347                 | 1         | 8.347              |          |          |
| Lab, hypothesis                   | 8.347                 | 1         | 8.347              | 1.189    | .473     |
| Lab, error                        | 7.022                 | 1         | 7.022              |          |          |
| Extraction type, hypothesis       | 12.232                | 1         | 12.232             | 1.742    | .413     |
| Extraction type, error            | 7.022                 | 1         | 7.022              |          |          |
| Extraction type * Lab, hypothesis | 7.022                 | 1         | 7.022              | 165.302  | <.001    |
| Extraction type * Lab, error      | .340                  | 8         | .042               |          |          |

**Table S63.** Mann-Whitney test summary table for analysis of aspen fine root NSC, enzyme method, Fig 5.

| <b>N</b> | <b>Test statistic</b> | <b>p</b> |
|----------|-----------------------|----------|
| 12       | 0                     | 0.002    |

**Table S64.** ANOVA summary table for aspen fine root sugar, acid method, Fig. 5.

| <b>Source</b>                     | <b>Sum of Squares</b> | <b>df</b> | <b>Mean square</b> | <b>F</b> | <b>p</b> |
|-----------------------------------|-----------------------|-----------|--------------------|----------|----------|
| Intercept, hypothesis             | 5863.150              | 1         | 5863.150           | 466.986  | .029     |
| Intercept, error                  | 12.555                | 1         | 12.555             |          |          |
| Lab, hypothesis                   | 12.555                | 1         | 12.555             | 59.936   | .082     |
| Lab, error                        | .209                  | 1         | .209               |          |          |
| Extraction type, hypothesis       | 1.074                 | 1         | 1.074              | 5.128    | .265     |
| Extraction type, error            | .209                  | 1         | .209               |          |          |
| Extraction type * Lab, hypothesis | .209                  | 1         | .209               | .942     | .360     |
| Extraction type * Lab, error      | 1.779                 | 8         | .222               |          |          |

**Table S65.** Mann-Whitney test summary table for analysis of aspen fine root starch, acid method, Fig 5.

| <b>N</b> | <b>Test statistic</b> | <b>p</b> |
|----------|-----------------------|----------|
| 12       | 12                    | 0.394    |

**Table S66.** ANOVA summary table for aspen fine root NSC, acid method, Fig. 5.

| Source                            | Sum of Squares | df | Mean square | F             | p     |
|-----------------------------------|----------------|----|-------------|---------------|-------|
| Intercept, hypothesis             | 15951.979      | 1  | 15951.979   | 119639844.000 | <.001 |
| Intercept, error                  | .000           | 1  | .000        |               |       |
| Lab, hypothesis                   | .000           | 1  | .000        | .001          | .976  |
| Lab, error                        | .097           | 1  | .097        |               |       |
| Extraction type, hypothesis       | .053           | 1  | .053        | .549          | .594  |
| Extraction type, error            | .097           | 1  | .097        |               |       |
| Extraction type * Lab, hypothesis | .097           | 1  | .097        | .392          | .549  |
| Extraction type * Lab, error      | 1.983          | 8  | .248        |               |       |

**Table S67.** ANOVA summary table for pine fine root sugar, IC method, Fig. 5.

| Source                            | Sum of Squares | df | Mean square | F      | p    |
|-----------------------------------|----------------|----|-------------|--------|------|
| Intercept, hypothesis             | 38.231         | 1  | 38.231      | 27.806 | .119 |
| Intercept, error                  | 1.375          | 1  | 1.375       |        |      |
| Lab, hypothesis                   | 1.375          | 1  | 1.375       | 1.741  | .413 |
| Lab, error                        | .790           | 1  | .790        |        |      |
| Extraction type, hypothesis       | .097           | 1  | .097        | .123   | .785 |
| Extraction type, error            | .790           | 1  | .790        |        |      |
| Extraction type * Lab, hypothesis | .790           | 1  | .790        | 22.201 | .002 |
| Extraction type * Lab, error      | .285           | 8  | .036        |        |      |

**Table S68.** Mann-Whitney test summary table for analysis of pine fine root starch, IC method, Fig 5.

| N  | Test statistic | p     |
|----|----------------|-------|
| 12 | 20             | 0.818 |

**Table S69.** Mann-Whitney test summary table for analysis of pine fine root NSC, IC method, Fig 5.

| N  | Test statistic | p     |
|----|----------------|-------|
| 12 | 23             | 0.485 |

**Table S70.** Mann-Whitney test summary table for analysis of pine fine root sugar, enzyme method, Fig 5.

| N  | Test statistic | p     |
|----|----------------|-------|
| 12 | 3              | 0.015 |



**Table S71.** ANOVA summary table for pine fine root starch, enzyme method, Fig. 5.

| <b>Source</b>                     | <b>Sum of Squares</b> | <b>df</b> | <b>Mean square</b> | <b>F</b> | <b>p</b> |
|-----------------------------------|-----------------------|-----------|--------------------|----------|----------|
| Intercept, hypothesis             | 49.970                | 1         | 49.970             | 20.214   | .139     |
| Intercept, error                  | 2.472                 | 1         | 2.472              |          |          |
| Lab, hypothesis                   | 2.472                 | 1         | 2.472              | 74.513   | .073     |
| Lab, error                        | .033                  | 1         | .033               |          |          |
| Extraction type, hypothesis       | .088                  | 1         | .088               | 2.665    | .350     |
| Extraction type, error            | .033                  | 1         | .033               |          |          |
| Extraction type * Lab, hypothesis | .033                  | 1         | .033               | 4.167    | .076     |
| Extraction type * Lab, error      | .064                  | 8         | .008               |          |          |

**Table S72.** Mann-Whitney test summary table for analysis of pine fine root NSC, enzyme method, Fig 5.

| <b>N</b> | <b>Test statistic</b> | <b>p</b> |
|----------|-----------------------|----------|
| 12       | 9                     | 0.18     |

**Table S73.** ANOVA summary table for pine fine root sugar, acid method, Fig. 5.

| <b>Source</b>                     | <b>Sum of Squares</b> | <b>df</b> | <b>Mean square</b> | <b>F</b> | <b>p</b> |
|-----------------------------------|-----------------------|-----------|--------------------|----------|----------|
| Intercept, hypothesis             | 318.761               | 1         | 318.761            | 223.964  | .042     |
| Intercept, error                  | 1.423                 | 1         | 1.423              |          |          |
| Lab, hypothesis                   | 1.423                 | 1         | 1.423              | 9.334    | .201     |
| Lab, error                        | .152                  | 1         | .152               |          |          |
| Extraction type, hypothesis       | .057                  | 1         | .057               | .374     | .650     |
| Extraction type, error            | .152                  | 1         | .152               |          |          |
| Extraction type * Lab, hypothesis | .152                  | 1         | .152               | 3.303    | .107     |
| Extraction type * Lab, error      | .369                  | 8         | .046               |          |          |

**Table S74.** ANOVA summary table for pine fine root starch, acid method, Fig. 5.

| <b>Source</b>                     | <b>Sum of Squares</b> | <b>df</b> | <b>Mean square</b> | <b>F</b> | <b>p</b> |
|-----------------------------------|-----------------------|-----------|--------------------|----------|----------|
| Intercept, hypothesis             | 16.765                | 1         | 16.765             | 545.077  | .027     |
| Intercept, error                  | .031                  | 1         | .031               |          |          |
| Lab, hypothesis                   | .031                  | 1         | .031               | 11.633   | .182     |
| Lab, error                        | .003                  | 1         | .003               |          |          |
| Extraction type, hypothesis       | .065                  | 1         | .065               | 24.564   | .127     |
| Extraction type, error            | .003                  | 1         | .003               |          |          |
| Extraction type * Lab, hypothesis | .003                  | 1         | .003               | .462     | .516     |
| Extraction type * Lab, error      | .046                  | 8         | .006               |          |          |

**Table S75.** ANOVA summary table for pine fine root, acid method, Fig. 5.

| Source                            | Sum of Squares | df | Mean square | F       | p    |
|-----------------------------------|----------------|----|-------------|---------|------|
| Intercept, hypothesis             | 481.587        | 1  | 481.587     | 257.217 | .040 |
| Intercept, error                  | 1.872          | 1  | 1.872       |         |      |
| Lab, hypothesis                   | 1.872          | 1  | 1.872       | 9.474   | .200 |
| Lab, error                        | .198           | 1  | .198        |         |      |
| Extraction type, hypothesis       | .241           | 1  | .241        | 1.219   | .469 |
| Extraction type, error            | .198           | 1  | .198        |         |      |
| Extraction type * Lab, hypothesis | .198           | 1  | .198        | 3.717   | .090 |
| Extraction type * Lab, error      | .425           | 8  | .053        |         |      |

**Table S76.** ANOVA summary table for analysis of aspen fine root sugar, Fig. 6.

| Source          | Sum of Squares | df | Mean square | F         | p     |
|-----------------|----------------|----|-------------|-----------|-------|
| Corrected Model | 30.699         | 5  | 6.140       | 49.478    | <.001 |
| Intercept       | 7815.000       | 1  | 7815.000    | 62976.229 | <.001 |
| Lab             | 30.699         | 5  | 6.140       | 49.478    | <.001 |
| Error           | 1.489          | 12 | .124        |           |       |
| Total           | 7847.189       | 18 |             |           |       |

**Table S77.** ANOVA summary table for analysis of aspen fine root starch, Fig. 6.

| Source          | Sum of Squares | df | Mean square | F        | p     |
|-----------------|----------------|----|-------------|----------|-------|
| Corrected Model | 1.469          | 5  | .294        | .814     | .562  |
| Intercept       | 2533.059       | 1  | 2533.059    | 7018.512 | <.001 |
| Lab             | 1.469          | 5  | .294        | .814     | .562  |
| Error           | 4.331          | 12 | .361        |          |       |
| Total           | 2538.859       | 18 |             |          |       |

**Table S78.** Kruskal-Wallis summary table for analysis of aspen fine root NSC, Fig 6.

| N  | Test statistic | df | p     |
|----|----------------|----|-------|
| 18 | 15.784         | 5  | 0.007 |

**Table S79.** Kruskal-Wallis summary table for analysis of pine fine root sugar, Fig 6. Despite a significant overall result, a post hoc Dunn's test showed significant differences between labs.

| N  | Test statistic | df | p     |
|----|----------------|----|-------|
| 18 | 14.168         | 5  | 0.015 |

**Table S80.** ANOVA summary table for analysis of pine fine root starch, Fig. 6.

| <b>Source</b>   | <b>Sum of Squares</b> | <b>df</b> | <b>Mean square</b> | <b>F</b> | <b>p</b> |
|-----------------|-----------------------|-----------|--------------------|----------|----------|
| Corrected Model | .150                  | 5         | .030               | 11.665   | <.001    |
| Intercept       | 8.584                 | 1         | 8.584              | 3344.262 | <.001    |
| Lab             | .150                  | 5         | .030               | 11.665   | <.001    |
| Error           | .031                  | 12        | .003               |          |          |
| Total           | 8.764                 | 18        |                    |          |          |

**Table S81.** ANOVA summary table for analysis of pine fine root NSC, Fig. 6.

| <b>Source</b>   | <b>Sum of Squares</b> | <b>df</b> | <b>Mean square</b> | <b>F</b> | <b>p</b> |
|-----------------|-----------------------|-----------|--------------------|----------|----------|
| Corrected Model | 2.637                 | 5         | .527               | 9.189    | .001     |
| Intercept       | 442.823               | 1         | 442.823            | 7715.711 | <.001    |
| Lab             | 2.637                 | 5         | .527               | 9.189    | .001     |
| Error           | .631                  | 11        | .057               |          |          |
| Total           | 461.286               | 17        |                    |          |          |

**Table S82.** ANOVA summary table for analysis of aspen leaf sugar, Fig. S1.

| <b>Source</b>      | <b>Sum of Squares</b> | <b>df</b> | <b>Mean square</b> | <b>F</b>   | <b>p</b> |
|--------------------|-----------------------|-----------|--------------------|------------|----------|
| Corrected Model    | 14.607                | 7         | 2.087              | 48.157     | <.001    |
| Intercept          | 7256.165              | 1         | 7256.165           | 167450.403 | <.001    |
| Treatment          | 12.092                | 1         | 12.092             | 279.037    | <.001    |
| Storage            | 1.328                 | 3         | .443               | 10.216     | .001     |
| Treatment *Storage | 1.188                 | 3         | .396               | 9.136      | .001     |
| Error              | .693                  | 16        | .043               |            |          |
| Total              | 7271.466              | 24        |                    |            |          |

**Table S83.** ANOVA summary table for analysis of aspen leaf starch, Fig. S1.

| <b>Source</b>      | <b>Sum of Squares</b> | <b>df</b> | <b>Mean square</b> | <b>F</b> | <b>p</b> |
|--------------------|-----------------------|-----------|--------------------|----------|----------|
| Corrected Model    | .013                  | 7         | .002               | 2.039    | .113     |
| Intercept          | .477                  | 1         | .477               | 535.042  | <.001    |
| Treatment          | .002                  | 1         | .002               | 2.226    | .155     |
| Storage            | .004                  | 3         | .001               | 1.626    | .223     |
| Treatment *Storage | .006                  | 3         | .002               | 2.390    | .107     |
| Error              | .014                  | 16        | .001               |          |          |
| Total              | .504                  | 24        |                    |          |          |

**Table S84.** ANOVA summary table for analysis of aspen leaf NSC, Fig. S1.

| <b>Source</b>      | <b>Sum of Squares</b> | <b>df</b> | <b>Mean square</b> | <b>F</b>   | <b>p</b> |
|--------------------|-----------------------|-----------|--------------------|------------|----------|
| Corrected Model    | 14.958                | 7         | 2.137              | 49.043     | <.001    |
| Intercept          | 7373.469              | 1         | 7373.469           | 169229.462 | <.001    |
| Treatment          | 12.370                | 1         | 12.370             | 283.899    | <.001    |
| Storage            | 1.343                 | 3         | .448               | 10.271     | .001     |
| Treatment *Storage | 1.246                 | 3         | .415               | 9.530      | .001     |
| Error              | .697                  | 16        | .044               |            |          |
| Total              | 7389.124              | 24        |                    |            |          |

**Table S85.** ANOVA summary table for analysis of aspen stem sugar, Fig. S1.

| <b>Source</b>      | <b>Sum of Squares</b> | <b>df</b> | <b>Mean square</b> | <b>F</b>   | <b>p</b> |
|--------------------|-----------------------|-----------|--------------------|------------|----------|
| Corrected Model    | 1.274                 | 7         | .182               | 7.083      | .001     |
| Intercept          | 3492.551              | 1         | 3492.551           | 135911.509 | <.001    |
| Treatment          | .026                  | 1         | .026               | .993       | .334     |
| Storage            | .880                  | 3         | .293               | 11.417     | <.001    |
| Treatment *Storage | .368                  | 3         | .123               | 4.780      | .015     |
| Error              | .411                  | 16        | .026               |            |          |
| Total              | 3494.236              | 24        |                    |            |          |

**Table S86.** ANOVA summary table for analysis of aspen stem starch, Fig. S1.

| <b>Source</b>      | <b>Sum of Squares</b> | <b>df</b> | <b>Mean square</b> | <b>F</b> | <b>p</b> |
|--------------------|-----------------------|-----------|--------------------|----------|----------|
| Corrected Model    | 1.649                 | 7         | .236               | 5.004    | .004     |
| Intercept          | 199.773               | 1         | 199.773            | 4244.303 | <.001    |
| Treatment          | .735                  | 1         | .735               | 15.621   | .001     |
| Storage            | .315                  | 3         | .105               | 2.233    | .124     |
| Treatment *Storage | .598                  | 3         | .199               | 4.235    | .022     |
| Error              | .753                  | 16        | .047               |          |          |
| Total              | 202.175               | 24        |                    |          |          |

**Table S87.** ANOVA summary table for analysis of aspen stem NSC, Fig. S1.

| <b>Source</b>      | <b>Sum of Squares</b> | <b>df</b> | <b>Mean square</b> | <b>F</b>  | <b>p</b> |
|--------------------|-----------------------|-----------|--------------------|-----------|----------|
| Corrected Model    | 1.949                 | 7         | .278               | 3.491     | .018     |
| Intercept          | 5362.864              | 1         | 5362.864           | 67245.944 | <.001    |
| Treatment          | 1.033                 | 1         | 1.033              | 12.957    | .002     |
| Storage            | .176                  | 3         | .059               | .737      | .545     |
| Treatment *Storage | .739                  | 3         | .246               | 3.090     | .057     |
| Error              | 1.276                 | 16        | .080               |           |          |
| Total              | 5366.089              | 24        |                    |           |          |

**Table S88.** ANOVA summary table for analysis of spruce needle sugar, Fig. S1.

| <b>Source</b>      | <b>Sum of Squares</b> | <b>df</b> | <b>Mean square</b> | <b>F</b>   | <b>p</b> |
|--------------------|-----------------------|-----------|--------------------|------------|----------|
| Corrected Model    | 1.259                 | 7         | .180               | 2.881      | .038     |
| Intercept          | 6567.287              | 1         | 6567.287           | 105213.323 | <.001    |
| Treatment          | .262                  | 1         | .262               | 4.194      | .057     |
| Storage            | .382                  | 3         | .127               | 2.041      | .149     |
| Treatment *Storage | .615                  | 3         | .205               | 3.282      | .048     |
| Error              | .999                  | 16        | .062               |            |          |
| Total              | 6569.544              | 24        |                    |            |          |

**Table S89.** ANOVA summary table for analysis of spruce needle starch, Fig. S1.

| <b>Source</b>      | <b>Sum of Squares</b> | <b>df</b> | <b>Mean square</b> | <b>F</b> | <b>p</b> |
|--------------------|-----------------------|-----------|--------------------|----------|----------|
| Corrected Model    | .411                  | 7         | .059               | 26.655   | <.001    |
| Intercept          | 6.988                 | 1         | 6.988              | 3169.884 | <.001    |
| Treatment          | .346                  | 1         | .346               | 157.078  | <.001    |
| Storage            | .033                  | 3         | .011               | 5.000    | .012     |
| Treatment *Storage | .032                  | 3         | .011               | 4.837    | .014     |
| Error              | .035                  | 16        | .002               |          |          |
| Total              | 7.435                 | 24        |                    |          |          |

**Table S90.** ANOVA summary table for analysis of spruce needle NSC, Fig. S1.

| <b>Source</b>      | <b>Sum of Squares</b> | <b>df</b> | <b>Mean square</b> | <b>F</b>   | <b>p</b> |
|--------------------|-----------------------|-----------|--------------------|------------|----------|
| Corrected Model    | 2.141                 | 7         | .306               | 5.364      | .003     |
| Intercept          | 7002.458              | 1         | 7002.458           | 122787.318 | <.001    |
| Treatment          | 1.220                 | 1         | 1.220              | 21.384     | <.001    |
| Storage            | .219                  | 3         | .073               | 1.283      | .314     |
| Treatment *Storage | .702                  | 3         | .234               | 4.104      | .024     |
| Error              | .912                  | 16        | .057               |            |          |
| Total              | 7005.512              | 24        |                    |            |          |

**Table S91.** One-sample t-test summary table for analysis of s1 using water extraction, IC method, Tables S3, S4, S5.

| <b>Component</b> | <b>t</b> | <b>df</b> | <b>p</b> | <b>Mean Difference</b> |
|------------------|----------|-----------|----------|------------------------|
| Sugar            | -1.999   | 5         | .102     | -.96167                |
| Starch           | .581     | 5         | .587     | .89377                 |
| Total NSC        | -.036    | 5         | .973     | -.06650                |

**Table S92.** One-sample t-test summary table for analysis of s1 using water extraction, enzyme method, Tables S3, S4, S5.

| <b>Component</b> | <b>t</b> | <b>df</b> | <b>p</b> | <b>Mean Difference</b> |
|------------------|----------|-----------|----------|------------------------|
| Sugar            | -2.363   | 5         | .064     | -2.32167               |
| Starch           | 4.627    | 5         | .006     | 2.44877                |
| Total NSC        | .109     | 5         | .918     | .12443                 |

**Table S93.** One-sample t-test summary table for analysis of s1 using water extraction, acid method, Tables S3, S4, S5.

| <b>Component</b> | <b>t</b> | <b>df</b> | <b>p</b> | <b>Mean Difference</b> |
|------------------|----------|-----------|----------|------------------------|
| Sugar            | 5.187    | 5         | .004     | 23.72833               |
| Starch           | -7.776   | 5         | .001     | -36.95957              |
| Total NSC        | -69.392  | 5         | <.001    | -13.22907              |

**Table S94.** One-sample t-test summary table for analysis of s2 using water extraction, IC method, Tables S3, S4, S5.

| <b>Component</b> | <b>t</b> | <b>df</b> | <b>p</b> | <b>Mean Difference</b> |
|------------------|----------|-----------|----------|------------------------|
| Sugar            | .426     | 5         | .688     | .17833                 |
| Starch           | -.979    | 5         | .372     | -1.85067               |
| Total NSC        | -.897    | 5         | .411     | -1.66803               |

**Table S95.** One-sample t-test summary table for analysis of s2 using water extraction, enzyme method, Tables S3, S4, S5.

| <b>Component</b> | <b>t</b> | <b>df</b> | <b>p</b> | <b>Mean Difference</b> |
|------------------|----------|-----------|----------|------------------------|
| Sugar            | -2.508   | 5         | .054     | -2.58167               |
| Starch           | .730     | 5         | .498     | .43767                 |
| Total NSC        | -2.933   | 5         | .033     | -2.13803               |

**Table S96.** One-sample t-test summary table for analysis of s2 using water extraction, acid method, Tables S3, S4, S5.

| <b>Component</b> | <b>t</b> | <b>df</b> | <b>p</b> | <b>Mean Difference</b> |
|------------------|----------|-----------|----------|------------------------|
| Sugar            | 6.993    | 5         | .001     | 39.63833               |
| Starch           | -8.336   | 5         | <.001    | -49.81900              |
| Total NSC        | -29.038  | 5         | <.001    | -10.17637              |
